# Supplementary material for: Antiulcer Potential of Olea europea L. cv. Arbequina Leaf Extract Supported by Metabolic Profiling and Molecular Docking
Source: MDPI journal article supplement (doi:10.3390/antiox10050644), 2021-04-22
Supplement: s1 [file s1]

# Supplementary Materials: Antiulcer Potential of *Olea europea* L. cv. Arbequina Leaf Extract Supported by Metabolic Profiling and Molecular Docking

Arafa Musa <sup>1,2,\*†</sup>, Nourhan Hisham Shady <sup>3,†</sup>, Shaimaa R. Ahmed <sup>4,5</sup>, Taghreed S. Alnusaire <sup>6</sup>, Ahmed M. Sayed <sup>7</sup>, Bassam F. Alowaiesh <sup>6,8</sup>, Ibrahim Sabouni <sup>8</sup>, Mohammad M. Al-Sanea <sup>9</sup>, Ehab M. Mostafa <sup>1,2</sup>, Khayrya A. Youssif <sup>10</sup>, Dalia H. Abu-Baih <sup>11</sup>, Mahmoud A. Elrehany <sup>11,12</sup> and Usama Ramadan Abdelmohsen <sup>3,13,\*</sup>

- <sup>1</sup> Pharmacognosy Department, College of Pharmacy, Jouf University, Sakaka, Aljouf 72341, Saudi Arabia; akmusa@ju.edu.sa
- <sup>2</sup> Department of Pharmacognosy, Faculty of Pharmacy, Al-Azhar University, Cairo 11371, Egypt
- <sup>3</sup> Department of Pharmacognosy, Faculty of Pharmacy, Deraya University, New Minia City, Minia 61111, Egypt; [Norhan.shady@deraya.edu.eg](mailto:Norhan.shady@deraya.edu.eg)
- <sup>4</sup> Department of Pharmacognosy, Faculty of Pharmacy, Cairo University, Kasr El-Aini Street, Cairo 11562, Egypt; shaimaa.ahmed@pharma.cu.edu.eg
- <sup>5</sup> Department of Pharmacognosy, College of Pharmacy, Jouf University, Sakaka, Aljouf 2014, Saudi Arabia
- <sup>6</sup> Biology Department, College of Science, Jouf University, Sakaka, Aljouf 72341, Saudi Arabia; tasalnosairi@ju.edu.sa (T.S.A.); bfalawish@ju.edu.sa (B.F.A.)
- <sup>7</sup> Department of Pharmacognosy, Faculty of Pharmacy, Nahda University, Beni-Suef 62513, Egypt; Ahmed.mohamed.sayed@nub.edu.eg
- <sup>8</sup> Olive Research Center, Jouf University, Sakaka, Aljouf 72341, Saudi Arabia; ibrahimsabouni@gmail.com
- <sup>9</sup> Pharmaceutical Chemistry Department, College of Pharmacy, Jouf University, Sakaka, Aljouf 72341, Saudi Arabia; mmalsanea@ju.edu.sa
- <sup>10</sup> Department of Pharmacognosy, Faculty of Pharmacy, Modern University for Technology and Information, Cairo 11371, Egypt; Khayrya.youssif@pharm.mti.edu.eg
- <sup>11</sup> Department of Biochemistry and molecular biology, Faculty of Pharmacy, Deraya University, New Minia City, Minia 61111, Egypt; Dalia.hamdy@deraya.edu.eg (D.H.A.-B.); Mahmoud.elrehany@deraya.edu.eg (M.A.E.)
- <sup>12</sup> Department of Biochemistry, Faculty of Medicine, Minia University, Minia 61519, Egypt
- <sup>13</sup> Department of Pharmacognosy, Faculty of Pharmacy, Minia University, Minia 61519, Egypt
- \* Correspondence: akmusa@ju.edu.sa (A.M.); usama.ramadan@mu.edu.eg (U.R.A.)
- † Those authors have equally contributed.

**Table S1.** Dereplicated metabolites from LC-HRESIMS analysis of *Olea europea* L. cv. Arbequina extract.

| Number | <i>m/z</i> | Name of structure                                              | Retention time<br>(RT) | Exact mass | Molecular<br>formula                           | Peak Area |
|--------|------------|----------------------------------------------------------------|------------------------|------------|------------------------------------------------|-----------|
| 1      | 455.352    | 3-Hydroxy-12-oleanen-28-oic<br>acid; 3β-form                   | 11.10857               | 456.3592   | C <sub>30</sub> H <sub>48</sub> O <sub>3</sub> | 1911.6799 |
| 2      | 471.34715  | 2,3-Dihydroxy-13(18)-<br>oleanen-28-oic acid; (2α,3β)-<br>form | 8.92862                | 472.354    | C <sub>30</sub> H <sub>48</sub> O <sub>4</sub> | 56903.08  |

| 3      | 539.17654  | Oleuropein                                              | 2.8017333              | 540.1838   | C <sub>25</sub> H <sub>32</sub> O <sub>13</sub> | 1975663.5     |
|--------|------------|---------------------------------------------------------|------------------------|------------|-------------------------------------------------|---------------|
| 4      | 153.05418  | 2-(3,4-Dihydroxyphenyl)<br>ethanol                      | 2.9556967              | 154.0629   | C <sub>8</sub> H <sub>10</sub> O <sub>3</sub>   | 221.12705     |
| 5      | 507.23793  | Oliverixanthone                                         | 13.451083              | 508.2452   | C <sub>30</sub> H <sub>36</sub> O <sub>7</sub>  | 1.6716347     |
| 6      | 153.05436  | Cleroidicin F                                           | 12.28353               | 154.063    | C <sub>8</sub> H <sub>10</sub> O <sub>3</sub>   | 25685.429     |
| 7      | 553.19194  | Oleuropein; 3"-Me ether                                 | 3.5709733              | 554.1992   | C <sub>26</sub> H <sub>34</sub> O <sub>13</sub> | 1064936.8     |
| 8      | 557.223    | Oleoside; 6'-O-(8-Hydroxy-<br>2,6-dimethyl-2E-octenoyl) | 2.6187433              | 558.2302   | C <sub>26</sub> H <sub>38</sub> O <sub>13</sub> | 1.0510785     |
| 9      | 279.2321   | 11-Octadecen-9-ynoic acid;<br>(E)-form                  | 11.044853              | 278.224    | C <sub>18</sub> H <sub>30</sub> O <sub>2</sub>  | 183466.78     |
| Number | <i>m/z</i> | Name of structure                                       | Retention time<br>(RT) | Exact mass | Molecular<br>formula                            | Concentration |
| 10     | 455.35185  | 3-Hydroxy-12-ursen-28-oic<br>acid; 3β-form, 3-Ketone    | 10.0559                | 454.3445   | C <sub>30</sub> H <sub>46</sub> O <sub>3</sub>  | 363.18763     |
| 11     | 377.18056  | 8-Epimer, (3,4-<br>dihydroxyphenylethyl) ester          | 3.3180933              | 378.13147  | C <sub>19</sub> H <sub>22</sub> O <sub>8</sub>  | 458.15578     |
| 12     | 439.15729  | Chebulic acid 4,5-<br>Didehydro(E-), tri-Et ester       | 2.9747767              | 438.156215 | C <sub>20</sub> H <sub>22</sub> O <sub>11</sub> | 1.8959597     |
| 13     | 623.59191  | Verbascoside                                            | 8.99936                | 624.592    | C <sub>29</sub> H <sub>36</sub> O <sub>15</sub> | 184019.11     |
| 14     | 285.03958  | Luteolin                                                | 4.4696567              | 286.047    | C <sub>15</sub> H <sub>10</sub> O <sub>6</sub>  | 1.2564833     |
| 15     | 225.11194  | Olenoside A                                             | 3.0286567              | 226.119    | C <sub>11</sub> H <sub>14</sub> O <sub>5</sub>  | 115.7028      |
| 16     | 317.06576  | Olivin                                                  | 4.3482767              | 316.05469  | C <sub>17</sub> H <sub>16</sub> O <sub>6</sub>  | 1.4666315     |
| 17     | 203.17977  | Olivacene                                               | 8.5318633              | 202.172    | C <sub>15</sub> H <sub>22</sub>                 | 2008631.1     |

---

|    |           |          |         |          |                                                |        |
|----|-----------|----------|---------|----------|------------------------------------------------|--------|
| 18 | 319.11732 | Oleacein | 9.00507 | 320.1259 | C <sub>17</sub> H <sub>20</sub> O <sub>6</sub> | 0.5145 |
|----|-----------|----------|---------|----------|------------------------------------------------|--------|

---

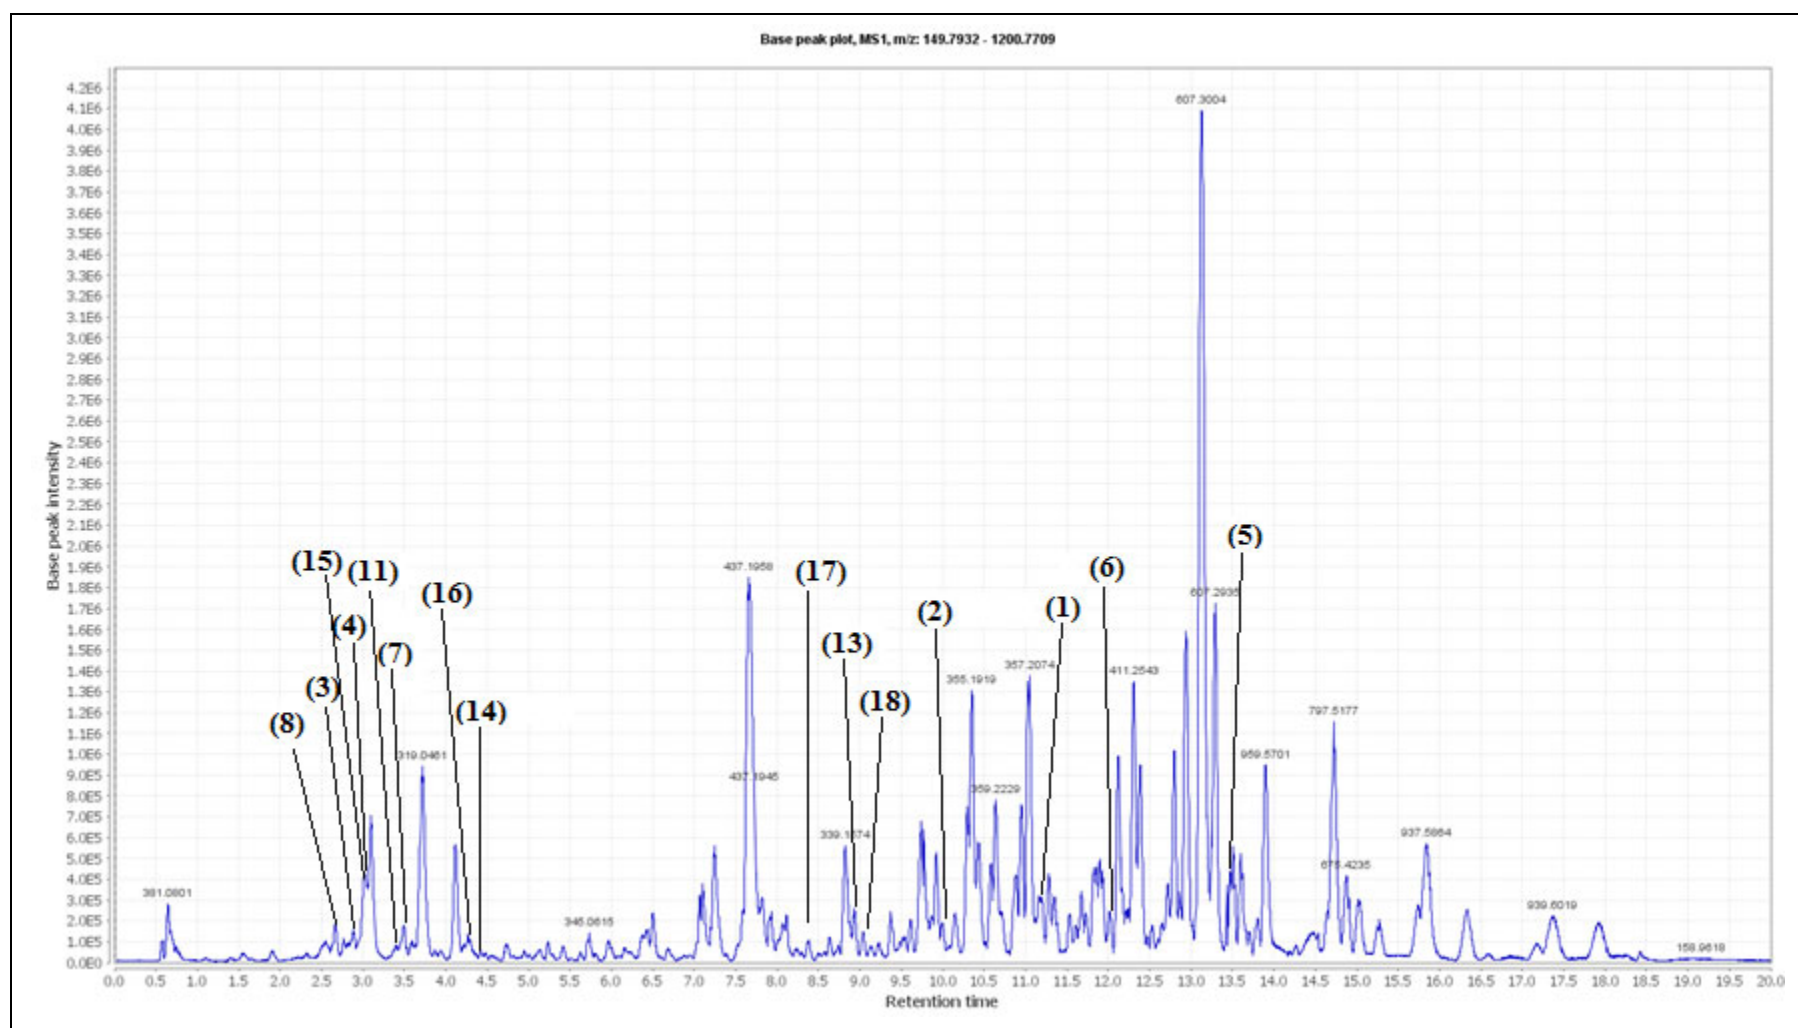

**Figure S1.** LC-HRESIMS Chromatogram of the putatively dereplicated metabolites of *Olea europaea* L. cv. Arbequina (Negative mode).

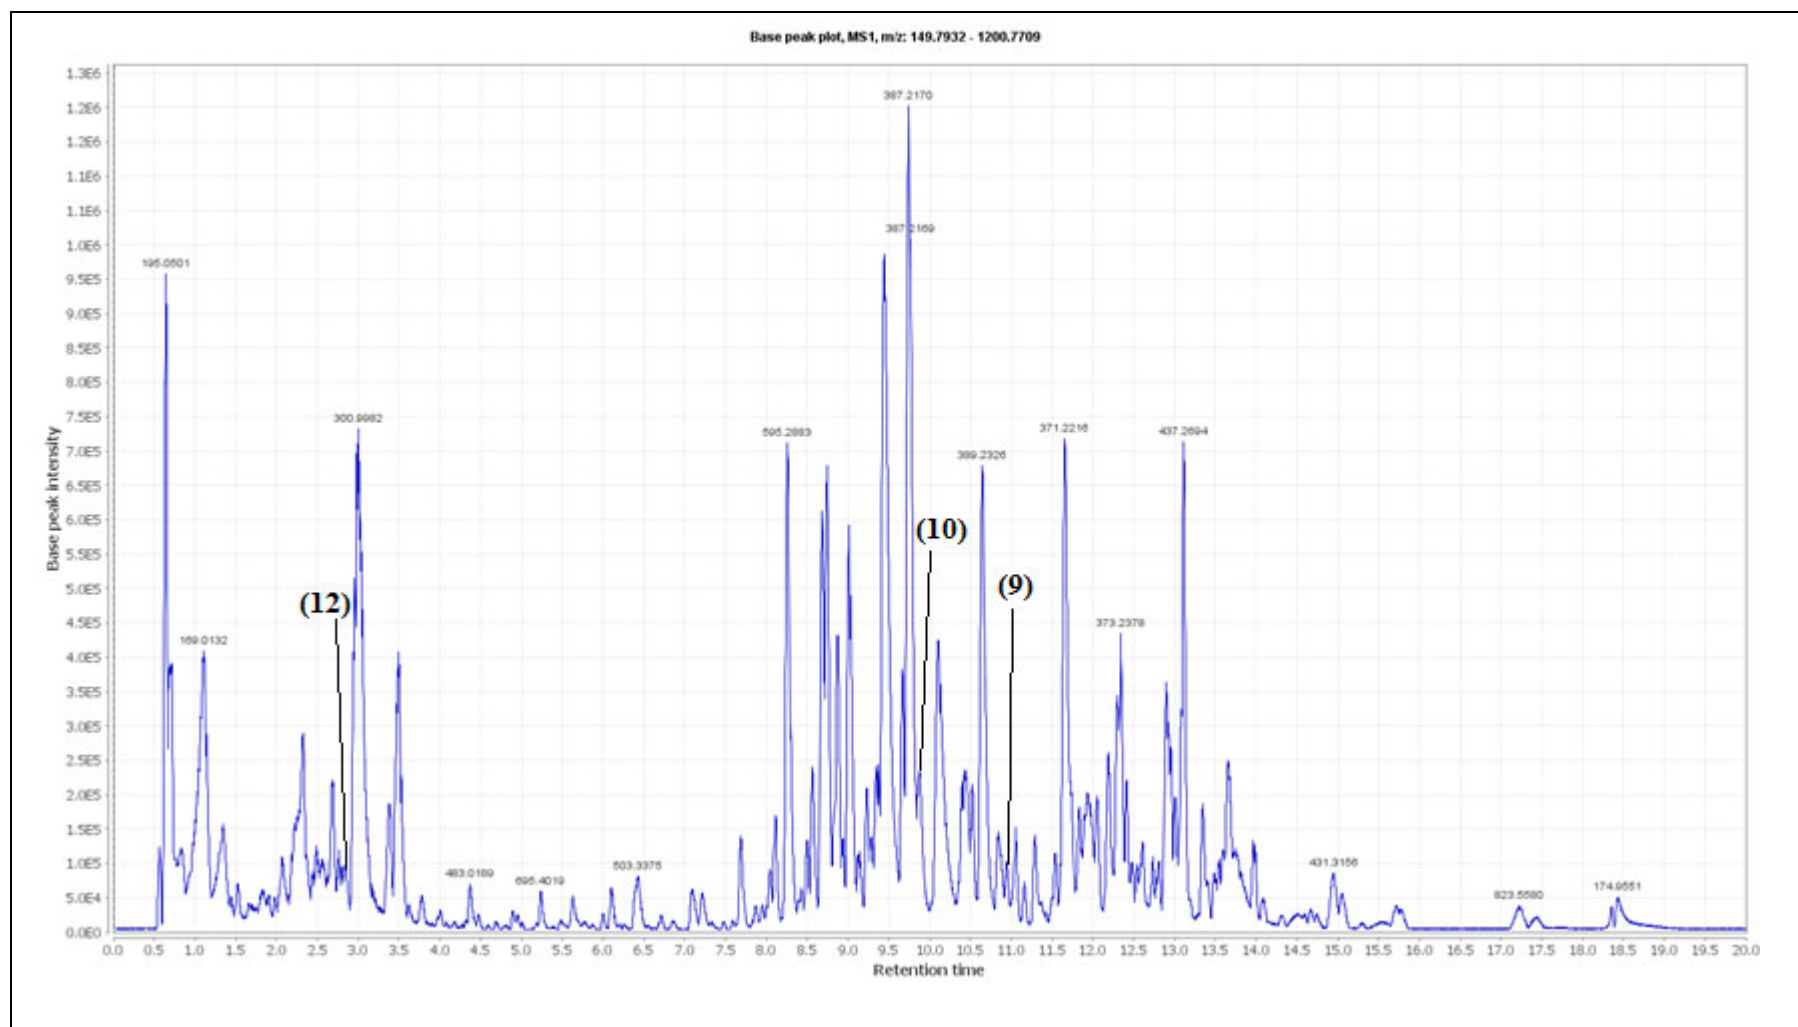

**Figure S2.** LC-HRESIMS Chromatogram of the putatively dereplicated metabolites of *Olea europaea* L. cv. Arbequina (Positive mode).
